# Supplementary material for: Testing the Effects of COVID-19 Confinement in Spanish Children: The Role of Parents’ Distress, Emotional Problems and Specific Parenting
Source: MDPI journal article supplement (doi:10.3390/ijerph17196975), 2020-09-24
Supplement: s1 [file s1]

|                                                                                           | Parenting distress |
|-------------------------------------------------------------------------------------------|--------------------|
| 1. I have difficulties to get him/her involved in schoolwork                              | .61                |
| 2. Sometimes, I have difficulties to find a variety of activities to get him/her involved | .61                |
| 3. It is difficult to find some time for me                                               | .67                |
| 4. It is difficult to give him/her all the attention he/she demands                       | .80                |
