# Supplementary material for: Testing the Effects of COVID-19 Confinement in Spanish Children: The Role of Parents’ Distress, Emotional Problems and Specific Parenting
Source: MDPI journal article supplement (doi:10.3390/ijerph17196975), 2020-09-24
Supplement: s1 [file s1]

| He/she...                                                                                               | Routine<br>maintenance | Prosocial<br>involvem. | Social-oriented<br>reflection | Social<br>bonding |
|---------------------------------------------------------------------------------------------------------|------------------------|------------------------|-------------------------------|-------------------|
| 1. Is creative (draws, does handicrafts...)                                                             | .62                    |                        |                               |                   |
| 2. Gets involved in schoolwork                                                                          | .49                    |                        |                               |                   |
| 5. Shows interest in his/her hygiene and personal care                                                  | .41                    |                        |                               |                   |
| 14. Adapts him/herself to a schedule and daily activity routine                                         | .32                    |                        |                               |                   |
| 3. Shows interest to spare time with family                                                             |                        | .55                    |                               |                   |
| 4. Shows interest for supportive social activities (e.g., applaud at 8pm)                               |                        | .67                    |                               |                   |
| 6. Is interested in helping with household chores                                                       |                        | .50                    |                               |                   |
| 7. Shows affect to others                                                                               |                        | .43                    |                               |                   |
| 8. Is able to appreciate the good things in everyday life, even the simplest                            |                        | .54                    |                               |                   |
| 9. Acknowledges the value of health workers, as well as other professionals who work to take care of us |                        |                        | .77                           |                   |
| 10. Assumes that we all should collaborate to solve social problems                                     |                        |                        | .85                           |                   |
| 11. Assumes the importance of health caring                                                             |                        |                        | .78                           |                   |
| 12. Keeps contact with his/her beloved ones who are not close, by phone, internet...                    |                        |                        |                               | .71               |
| 13. Keeps contact with other peers outside the family context (e.g., schoolmates, friends...)           |                        |                        |                               | .46               |
