# Supplementary material for: Testing the Effects of COVID-19 Confinement in Spanish Children: The Role of Parents’ Distress, Emotional Problems and Specific Parenting
Source: MDPI journal article supplement (doi:10.3390/ijerph17196975), 2020-09-24
Supplement: s1 [file s1]

|                                                                                                                    | Focused | Soothing | Structured | Avoidant |
|--------------------------------------------------------------------------------------------------------------------|---------|----------|------------|----------|
| 10. I get into the knowledge he/she has about the covid-19                                                         | .51     |          |            |          |
| 12. I show him/her some of the preventive and protective actions we all should take (e.g., washing hands properly) | .67     |          |            |          |
| 13. I try to solve his/her doubts about the covid-19, and its consequences                                         | .78     |          |            |          |
| 14. I encourage him/her to express his/her emotions about the situation                                            | .73     |          |            |          |
| 4. I try to keep calm so my child cannot feel my anxiousness                                                       |         | .46      |            |          |
| 5. If needed, I explain that he/she and our family and close friends are safe                                      |         | .36      |            |          |
| 15. I often show him/her affect (saying “I love you”, holding him/her)                                             |         | .46      |            |          |
| 6. I set a daily schedule and activities plan                                                                      |         |          | .55        |          |
| 7. I try to get him/her to exercise every day                                                                      |         |          | .68        |          |
| 8. Under the current circumstances, I try that he/she keeps a well- balanced diet                                  |         |          | .62        |          |
| 9. I try to share leisure activities with my child                                                                 |         |          | .68        |          |
| 11. I control the time he/she spends watching TV, and the kind of informative programs he/she watches              |         |          | .59        |          |
| 1. I avoid talking to him/her about covid-related issues                                                           |         |          |            | .67      |
| 2. I try not to let him/her know the seriousness of the problem                                                    |         |          |            | .86      |
| 3. I tell him/her not to worry                                                                                     |         |          |            | .36      |
