# Supplementary material for: Testing the Effects of COVID-19 Confinement in Spanish Children: The Role of Parents’ Distress, Emotional Problems and Specific Parenting
Source: MDPI journal article supplement (doi:10.3390/ijerph17196975), 2020-09-24
Supplement: s1 [file s1]

| The current situation...                       | Perceived distress |
|------------------------------------------------|--------------------|
| 1. Causes you stress                           | .74                |
| 2. Affects your family's economic situation    | .39                |
| 3. Damages the relationships within the family | .62                |
| 4. Raises your fear about the future           | .58                |
